# Supplementary material for: Biologically based method for the synthesis of Hg–Se nanostructures by Shewanella spp.
Source: Royal Society of Chemistry journal article supplement (doi:10.1039/c4ra12262c), 2015-01-01

# SI 1. The size distribution of selenium nanoparticles measured from TEM images via imageJ software; N: number of measured particles, curve: Gauss fit of dataset

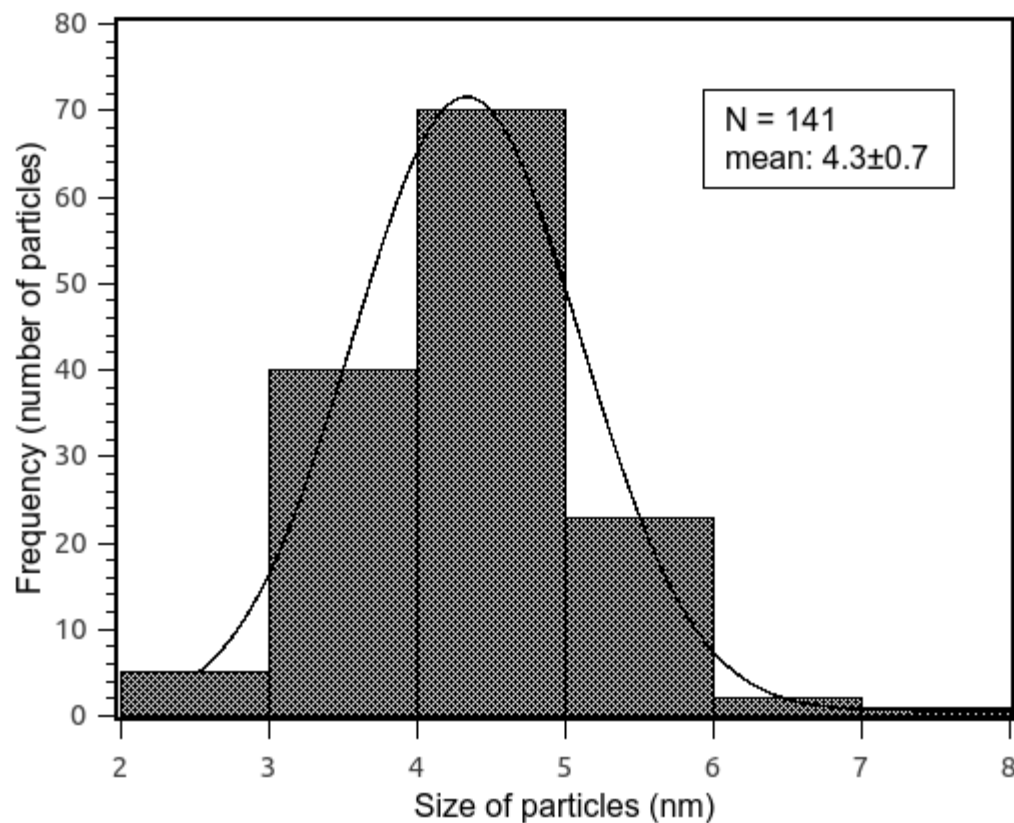

SI 2. TEM image of the Se nanowires after 24 hr incubation with liquid mercury.

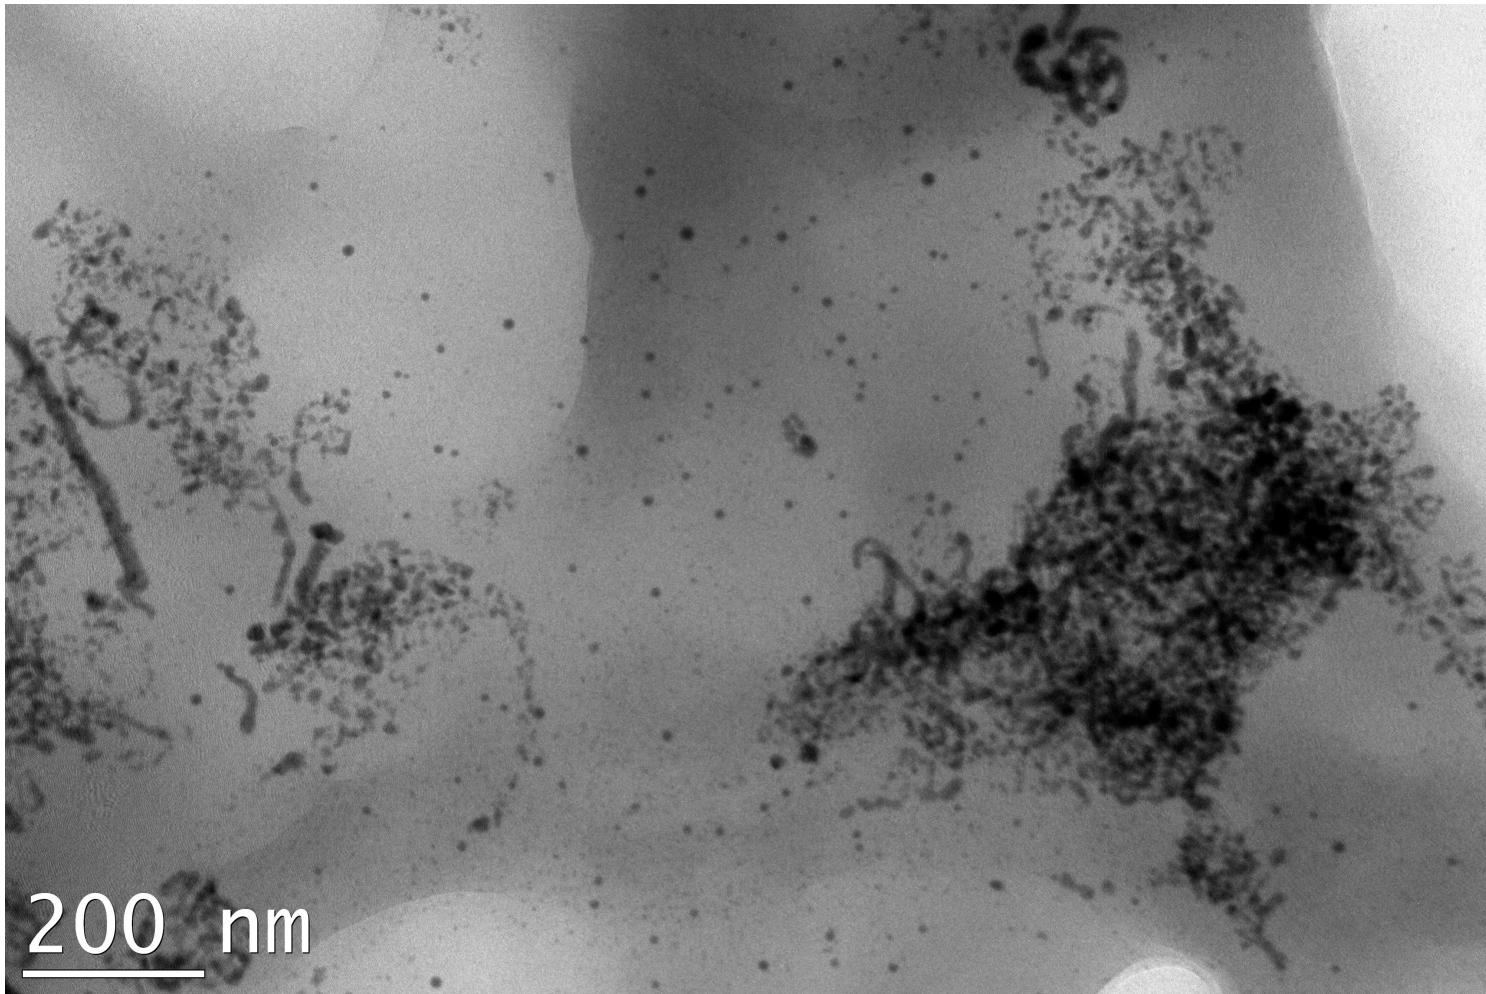

SI 3. TEM image of the Se nanowires (A) and polyhedral structures (B) after the incubation with liquid mercury.

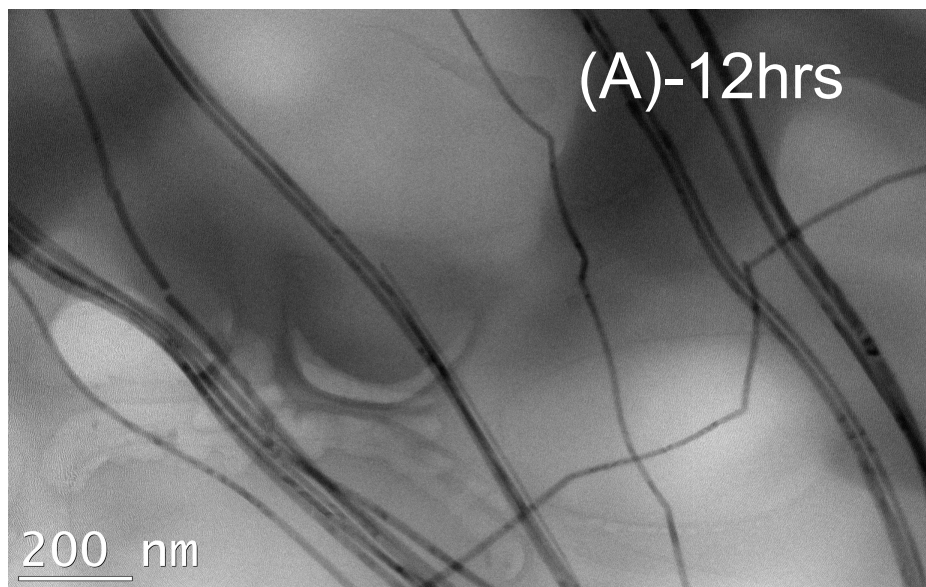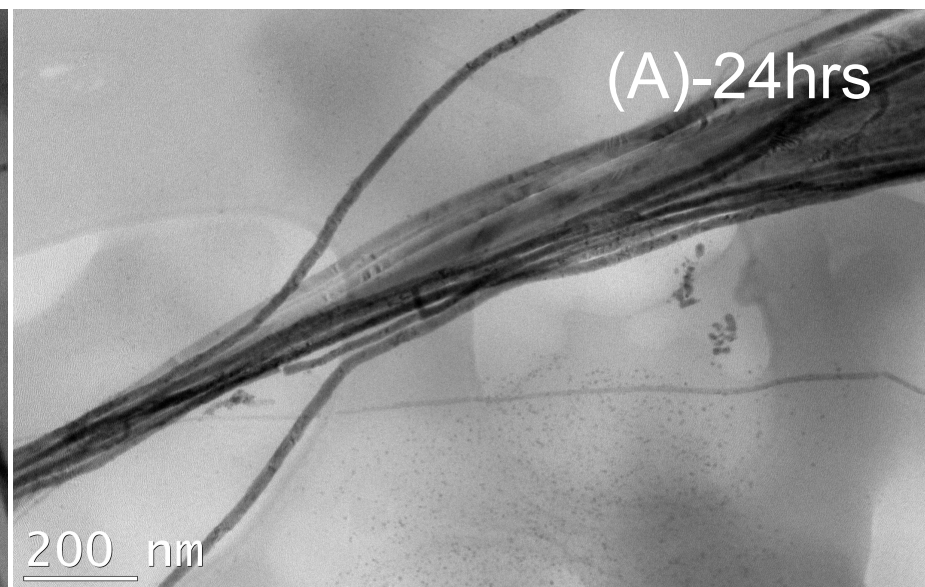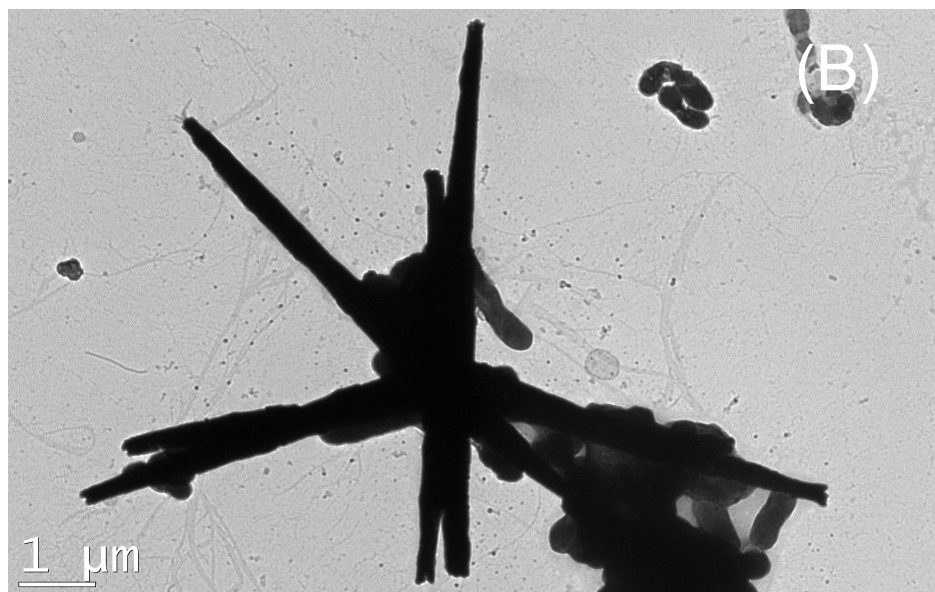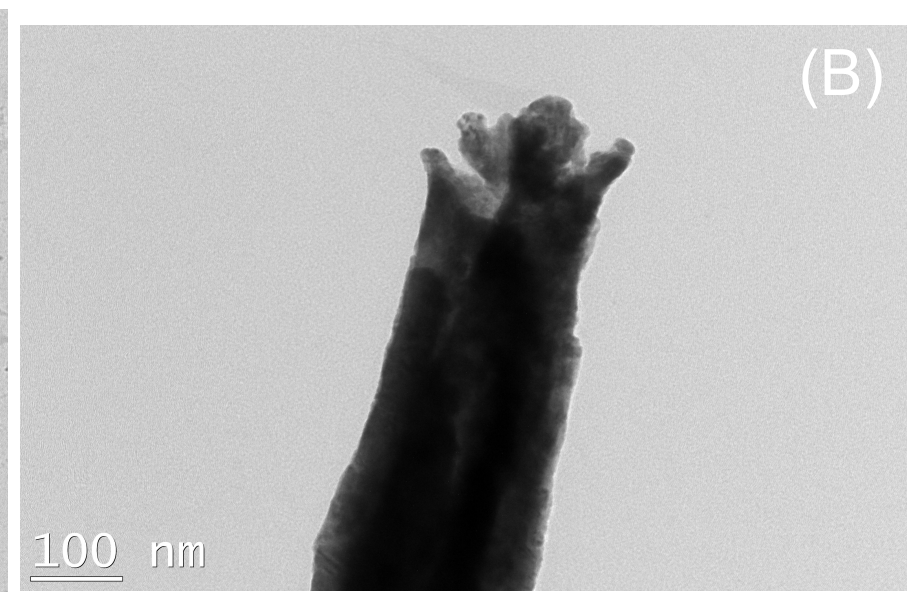

Supplement: c4ra12262c1.pdf [file c4ra12262c1.pdf]
